# Supplementary material for: Successful Bridge-to-Recovery Treatment in a Young Patient with Fulminant Eosinophilic Myocarditis: Roles of a Percutaneous Ventricular Assist Device and Endomyocardial Biopsy
Source: Case Rep Emerg Med. 2019 Jul 2;2019:8236735. doi: 10.1155/2019/8236735 (PMC6633872; doi:10.1155/2019/8236735)
Supplement: Supplementary Materials — The supplemental materials are movies to demonstrate that the heart function was depressed. Supplementary Figure 1: histological findings of the right-ventricular endomyocardial biopsy specimen 2 weeks after admission. [file 8236735.f1.zip]

Archive with 4 entries (3 files):
- 8236735.f1/
- 8236735.f1/Supplementary figure 1 20190617 final.pptx
- 8236735.f1/Supplementary Movie1 20190617 final.mp4
- 8236735.f1/Supplementary Movie2 20190617 final.mpg
